# Supplementary material for: A method for resolving changes in atmospheric He ∕ N 2 as an indicator of fossil fuel extraction and stratospheric circulation
Source: Copernicus journal article supplement (doi:10.5194/amt-14-2515-2021), 2021-03-31
Supplement: Supplementary file 1 [file amt-14-2515-2021-supplement.zip]

Archive with 2 entries (2 files):
- Data SI.xlsx
- amt-14-2515-2021-supplement-title-page.pdf
