# Supplementary material for: A method for resolving changes in atmospheric He ∕ N 2 as an indicator of fossil fuel extraction and stratospheric circulation
Source: Copernicus journal article supplement (doi:10.5194/amt-14-2515-2021), 2021-03-31
Supplement: Supplementary file 1 [file amt-14-2515-2021-supplement.zip › amt-14-2515-2021-supplement-title-page.pdf]

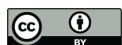

## *Supplement of*

# **A method for resolving changes in atmospheric He / N<sub>2</sub> as an indicator of fossil fuel extraction and stratospheric circulation**

**Benjamin Birner et al.**

*Correspondence to:* Benjamin Birner (bbirner@ucsd.edu)

- [amt-14-2515-2021-supplement-title-page.pdf](#)
- [Data SI.xlsx](#)

The copyright of individual parts of the supplement might differ from the article licence.
